# Supplementary material for: Nonlinear absorption, nonlinear scattering, and optical limiting properties of MoS2–ZnO composite-based organic glasses
Source: Royal Society of Chemistry journal article supplement (doi:10.1039/c4cp05227g), 2015-01-01
Supplement: c4cp05227g1.pdf [file c4cp05227g1.pdf]

## Electronic Supplementary Information

### **Nonlinear absorption, nonlinear scattering, and optical limiting properties of MoS<sub>2</sub>/ZnO composite-based organic glasses †**

**Bin Qu,<sup>a,b</sup> Qiuyun Ouyang,<sup>\*a</sup> Xianbo Yu,<sup>a</sup> Wenhe Luo,<sup>a</sup> Lihong Qi,<sup>a</sup> and Yujin Chen<sup>\*a</sup>**

*<sup>a</sup> Key Laboratory of In-Fiber Integrated Optics of Ministry of Education, College of Science, Harbin Engineering University, Harbin 150001, China.*

*E-mail: [chenyujin@hrbeu.edu.cn](mailto:chenyujin@hrbeu.edu.cn) and [qyouyang7823@aliyun.com](mailto:qyouyang7823@aliyun.com)*

*<sup>b</sup> Department of Applied Chemistry, College of Science, Northeast Agricultural University, Harbin 150030, China*

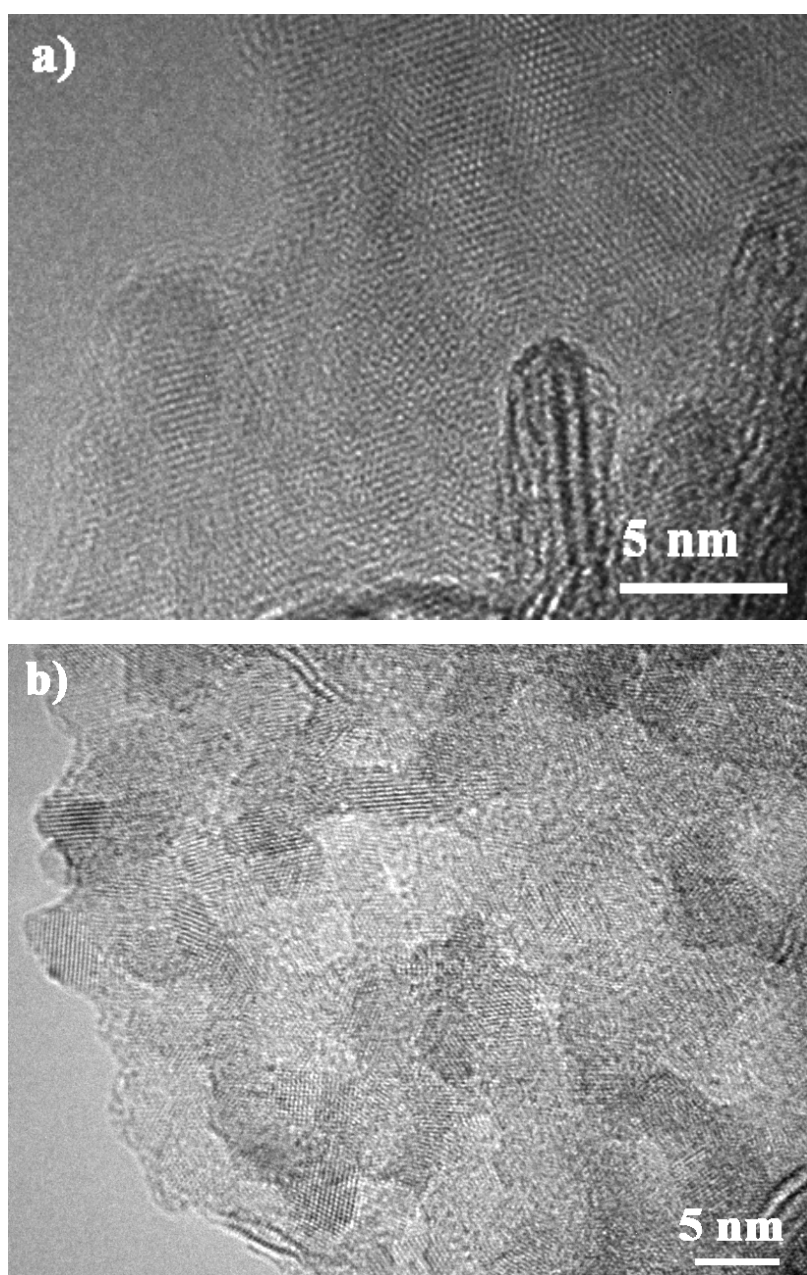

**Figure S1** The comparison of the high-magnification TEM images between a) MoS<sub>2</sub> nanosheets and b) MoS<sub>2</sub>/ZnO composites.

Fig. S2 shows the SEM images of MoS<sub>2</sub>/ZnO/PMMA organic glass. The SEM images of the MoS<sub>2</sub>/ZnO/PMMA organic glass confirm that MoS<sub>2</sub>/ZnO composites with original structure can be dispersed in PMMA organic glass.

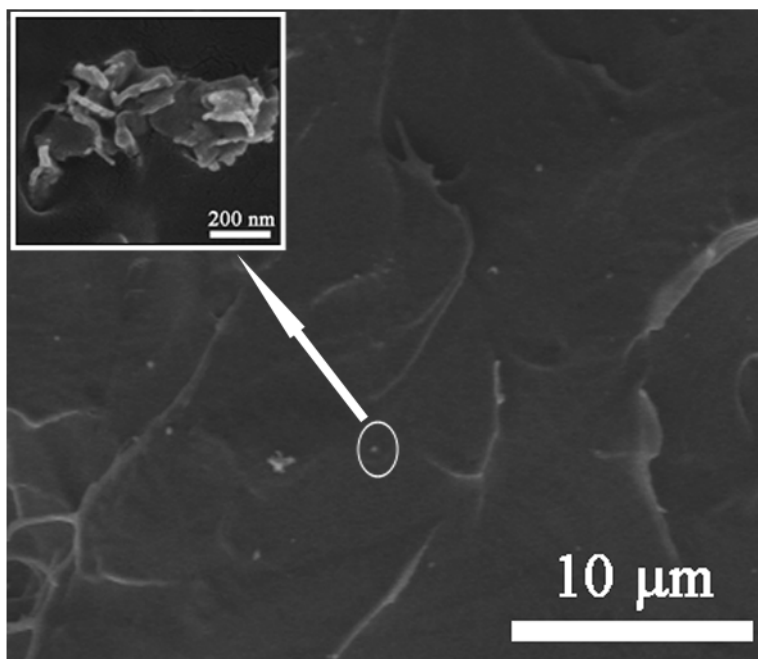

**Figure S2** The SEM images of MoS<sub>2</sub>/ZnO/PMMA organic glass

The deformation of the MoS<sub>2</sub>/ZnO/PMMA organic glass can be up to 2.82 mm, which is much larger than that of the slide glass (0.23 mm), as shown in Fig. S3.

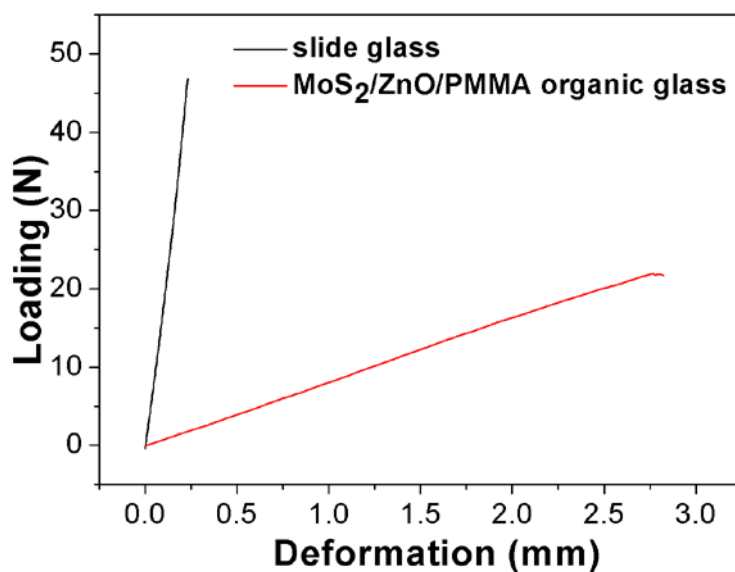

**Figure S3** The comparison of flexible experimental curves between slide glass and MoS<sub>2</sub>/ZnO/PMMA organic glass.
